# Supplementary material for: Altered AKT1 and MAPK1 Gene Expression on Peripheral Blood Mononuclear Cells and Correlation with T-Helper-Transcription Factors in Systemic Lupus Erythematosus Patients
Source: Hindawi journal article supplement (doi:10.1155/2012/495934), 2012-01-01
Supplement: f1 [file 495934.f1.pdf]

**Supplementary Table 1** Test to analyze the Gaussian distribution for cytokines plasma levels in SLE patients. <sup>1</sup>[Kolmogorov-Smirnov (KS) test (with Dallal-Wilkinson-Lilliefors P value)]

|                                             | IL-1 $\beta$ | IL-2   | IL-4     | IL-5     | IL-6     | IL-10  | IL-12    | IL-13  | IFN- $\gamma$ | TNF- $\alpha$ |
|---------------------------------------------|--------------|--------|----------|----------|----------|--------|----------|--------|---------------|---------------|
| KS normality test                           |              |        |          |          |          |        |          |        |               |               |
| KS distance                                 | 0.3467       | 0.2942 | 0.3782   | 0.4866   | 0.3726   | 0.2319 | 0.1984   | 0.3056 | 0.2623        | 0.3159        |
| P value                                     | 0.0001       | 0.0030 | P<0.0001 | P<0.0001 | P<0.0001 | 0.0542 | P > 0.10 | 0.0016 | 0.0148        | 0.0009        |
| Passed normality test (alpha=0.05)?         | No           | No     | No       | No       | No       | Yes    | Yes      | No     | No            | No            |
| P value summary                             | ***          | **     | ***      | ***      | ***      | ns     | ns       | **     | *             | ***           |
| D'Agostino & Pearson omnibus normality test |              |        |          |          |          |        |          |        |               |               |
| K2                                          | 4.246        | 5.512  | 20.04    | 29.18    | 16.75    | 8.592  | 14.61    | 4.113  | 3.481         | 3.291         |
| P value                                     | 0.1197       | 0.0635 | P<0.0001 | P<0.0001 | 0.0002   | 0.0136 | 0.0007   | 0.1279 | 0.1755        | 0.1929        |
| Passed normality test (alpha=0.05)?         | Yes          | Yes    | No       | No       | No       | No     | No       | Yes    | Yes           | Yes           |
| P value summary                             | ns           | ns     | ***      | ***      | ***      | *      | ***      | ns     | ns            | ns            |
| Shapiro-Wilk normality test                 |              |        |          |          |          |        |          |        |               |               |
| W                                           | 0.6847       | 0.7518 | 0.5787   | 0.4290   | 0.6059   | 0.7518 | 0.8044   | 0.7600 | 0.8080        | 0.7276        |
| P value                                     | 0.0004       | 0.0019 | P<0.0001 | P<0.0001 | P<0.0001 | 0.0019 | 0.0077   | 0.0024 | 0.0085        | 0.0011        |
| Passed normality test (alpha=0.05)?         | No           | No     | No       | No       | No       | No     | No       | No     | No            | No            |
| P value summary                             | ***          | **     | ***      | ***      | ***      | **     | **       | **     | **            | **            |

**Supplementary Table 2** Test to analyze the Gaussian distribution for cytokines plasma levels in Controls. <sup>1</sup>[Kolmogorov-Smirnov (KS) test (with Dallal-Wilkinson-Lilliefor P value)]

|                                             | IL-1 $\beta$ | IL-2     | IL-4     | IL-5     | IL-6     | IL-10  | IL-12  | IL-13    | IFN- $\gamma$ | TNF- $\alpha$ |
|---------------------------------------------|--------------|----------|----------|----------|----------|--------|--------|----------|---------------|---------------|
| KS normality test                           |              |          |          |          |          |        |        |          |               |               |
| KS distance                                 | 0.4100       | 0.4136   | 0.3568   | 0.5060   | 0.4778   | 0.2882 | 0.2401 | 0.5204   | 0.3797        | 0.2666        |
| P value                                     | P<0.0001     | P<0.0001 | P<0.0001 | P<0.0001 | P<0.0001 | 0.0042 | 0.0391 | P<0.0001 | P<0.0001      | 0.0121        |
| Passed normality test (alpha=0.05)?         | No           | No       | No       | No       | No       | No     | No     | No       | No            | No            |
| P value summary                             | ***          | ***      | ***      | ***      | ***      | **     | *      | ***      | ***           | *             |
| D'Agostino & Pearson omnibus normality test |              |          |          |          |          |        |        |          |               |               |
| K2                                          | 26.26        | 9.722    | 7.196    | 35.13    | 25.63    | 7.241  | 14.46  | 35.87    | 15.92         | 9.546         |
| P value                                     | P<0.0001     | 0.0077   | 0.0274   | P<0.0001 | P<0.0001 | 0.0268 | 0.0007 | P<0.0001 | 0.0003        | 0.0085        |
| Passed normality test (alpha=0.05)?         | No           | No       | No       | No       | No       | No     | No     | No       | No            | No            |
| P value summary                             | ***          | **       | *        | ***      | ***      | *      | ***    | ***      | ***           | **            |
| Shapiro-Wilk normality test                 |              |          |          |          |          |        |        |          |               |               |
| W                                           | 0.5786       | 0.5927   | 0.7116   | 0.3951   | 0.4820   | 0.7643 | 0.7490 | 0.3487   | 0.5575        | 0.8162        |
| P value                                     | P<0.0001     | P<0.0001 | 0.0007   | P<0.0001 | P<0.0001 | 0.0026 | 0.0018 | P<0.0001 | P<0.0001      | 0.0107        |
| Passed normality test (alpha=0.05)?         | No           | No       | No       | No       | No       | No     | No     | No       | No            | No            |
| P value summary                             | ***          | ***      | ***      | ***      | ***      | **     | **     | ***      | ***           | *             |

**Supplementary Table 3** Test to analyze the Gaussian distribution for cytokines relative mRNA levels in PBMC. <sup>1</sup>[Kolmogorov-Smirnov (KS) test (with Dallal-Wilkinson-Lilliefors P value)]

|                                             | IL1B     | IFNG   | IL12A  | IL6    | TNF    | IL10   | IL2      | TGFB2  | IL5      | TNFSF10  |
|---------------------------------------------|----------|--------|--------|--------|--------|--------|----------|--------|----------|----------|
| <sup>1</sup> KS normality test              |          |        |        |        |        |        |          |        |          |          |
| KS distance                                 | 0.2147   | 0.2170 | 0.2549 | 0.2407 | 0.2667 | 0.2540 | 0.2923   | 0.2339 | 0.3456   | 0.1720   |
| P value                                     | P > 0.10 | 0.0954 | 0.0207 | 0.0381 | 0.0121 | 0.0216 | 0.0034   | 0.0500 | 0.0006   | P > 0.10 |
| Passed normality test (alpha=0.05)?         | Yes      | Yes    | No     | No     | No     | No     | No       | Yes    | No       | Yes      |
| P value summary                             | ns       | ns     | *      | *      | *      | *      | **       | ns     | ***      | ns       |
| D'Agostino & Pearson omnibus normality test |          |        |        |        |        |        |          |        |          |          |
| K2                                          | 5.590    | 17.04  | 1.675  | 8.021  | 17.68  | 2.954  | 23.63    | 2.914  | 23.02    | 1.911    |
| P value                                     | 0.0611   | 0.0002 | 0.4328 | 0.0181 | 0.0001 | 0.2283 | P<0.0001 | 0.2329 | P<0.0001 | 0.3847   |
| Passed normality test (alpha=0.05)?         | Yes      | No     | Yes    | No     | No     | Yes    | No       | Yes    | No       | Yes      |
| P value summary                             | ns       | ***    | ns     | *      | ***    | ns     | ***      | ns     | ***      | ns       |
| Shapiro-Wilk normality test                 |          |        |        |        |        |        |          |        |          |          |
| W                                           | 0.8835   | 0.7856 | 0.8693 | 0.8169 | 0.7106 | 0.8486 | 0.6353   | 0.8630 | 0.6046   | 0.9266   |
| P value                                     | 0.0794   | 0.0046 | 0.0512 | 0.0109 | 0.0007 | 0.0274 | 0.0001   | 0.0422 | P<0.0001 | 0.3072   |
| Passed normality test (alpha=0.05)?         | Yes      | No     | Yes    | No     | No     | No     | No       | No     | No       | Yes      |
| P value summary                             | ns       | **     | ns     | *      | ***    | *      | ***      | *      | ***      | ns       |
